# Supplementary material for: Simultaneous determination of dopamine and ascorbic acid using β-cyclodextrin/Au nanoparticles/graphene-modified electrodes
Source: Royal Society of Chemistry journal article supplement (doi:10.1039/c6ay03013k), 2016-12-21
Supplement: c6ay03013k1.pdf [file c6ay03013k1.pdf]

## Supplementary material

### **Simultaneous determination of dopamine and ascorbic acid using $\beta$ -Cyclodextrin/Au nanoparticles/Graphene-modified electrode**

Zhu Chang<sup>a</sup>, Yanli Zhou<sup>a,b,\*</sup>, Lijing Hao, Yuanqiang Hao<sup>a</sup>, Xu Zhu<sup>a</sup>, Maotian Xu<sup>a,b,\*</sup>

<sup>a</sup> *Henan Key Laboratory of Biomolecular Recognition and Sensing, College of Chemistry and Chemical Engineering, Shangqiu Normal University, Shangqiu 476000 (P. R. China).*

<sup>b</sup> *College of Chemistry and Molecular Engineering, Zhengzhou University, Zhengzhou 450001, China*

\* Corresponding authors: Fax/Tel.: +86 370 3109178

E-mail addresses: zhouyanli@sqnc.edu.cn (Y. Zhou), xumaotian@163.com (M. T. Xu).

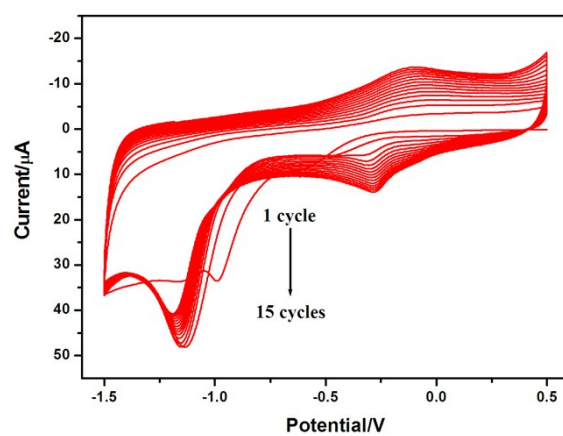

**Fig. S1.** Multisweep CVs of a GO/GCE in PBS (pH 7.0) containing 0.1 M KCl at a scan rate of  $50 \text{ mV s}^{-1}$ .

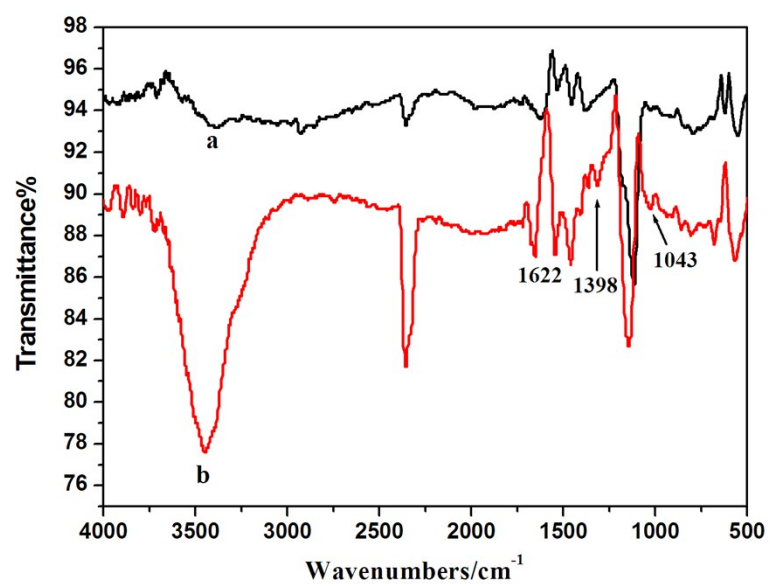

**Fig. S2.** FT-IR spectra of GO (a) and EDGO materials (b).

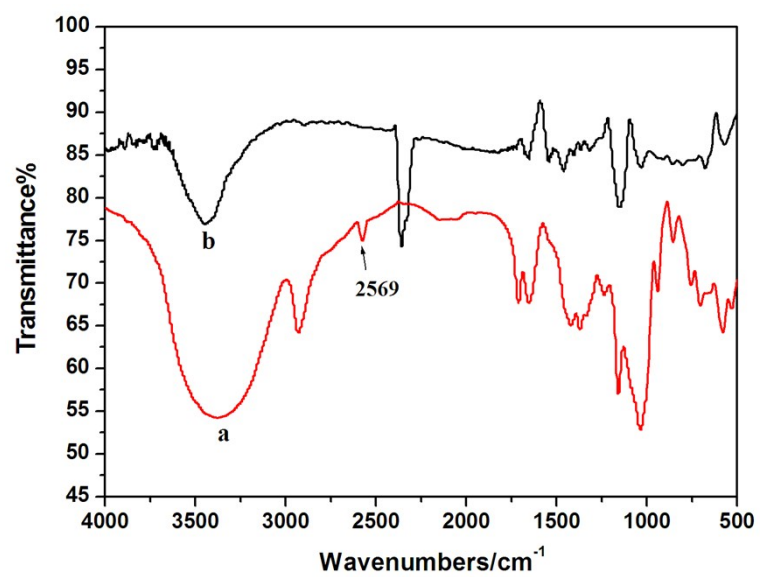

**Fig. S3.** FT-IR spectra of SH-β-CD (a) and β-CD/AuNPs (b).

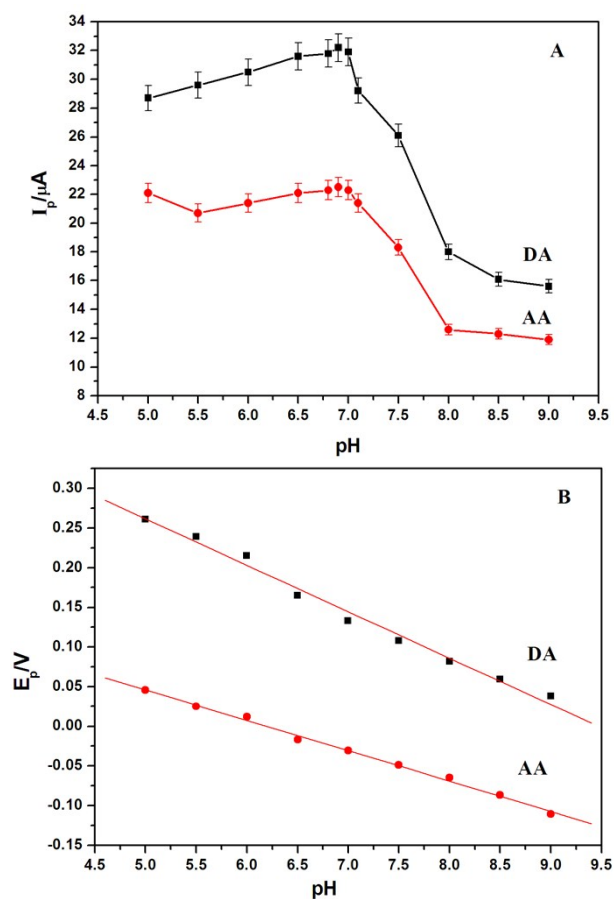

**Fig. S4.** Effects of pH on the anodic peak current (A) and anodic peak potential (B) of 10 mM AA and 20  $\mu$ M at  $\beta$ -CD/AuNPs/ERGO/GCE, respectively, scan rate: 50mVs<sup>-1</sup>, 0.1 M PBS.
